# Supplementary material
Source: PubMed Central journal article supplement (PMC11027709)
Supplement: 262_2020_2623_MOESM1_ESM.pdf [file 262_2020_2623_MOESM1_ESM.pdf]

## Supplementary figure legends

*Supplementary Figure 1:* Phorbol 12-myristate 13-acetate treatments induces phosphorylation of MAPKs and IκB in M1 and M2 cells.

In vitro differentiated human M1 and M2 cells were activated by 100 nM Phorbol 12-myristate 13-acetate (PMA) for the indicated times. Phosphorylation of p38 MAPK, JNK, ERK and IKK were visualized by western blotting of total cell lysates using phospho-specific antibodies. A representative image of three independent experiments is shown.

*Supplementary Figure 2: Aurora Kinase A inhibitor restores the TAK1 inhibitor-induced cell death in M1 macrophages.*

(A-B) Macrophages were pre-treated with 1.25 μM CCT137690 (AURKA inhibitor), 10 μM AR-A014418 (GSK3β) inhibitor, 7.5 μM GSK'872 RIPK3 inhibitor and for 1 hour followed by activation with 1 μM 5Z-7-oxozeaenol together with 50 μM Z-VAD). (C-D) Macrophages were pre-treated with 1.25 μM CCT137690 (AURKA inhibitor), 10 μM AR-A014418 (GSK3β) inhibitor, 7.5 μM GSK'872 RIPK3 inhibitor and for 1 hour followed by activation with 0.5 μM birinapant together with 50 μM Z-VAD. (A-D) After 24 hours the extent of cell death was determined by measuring the PI staining. The figures show the mean plus SD of at least five independent experiment.
