# Supplementary material
Source: PubMed Central journal article supplement (PMC11027709)

# Supplementary 1

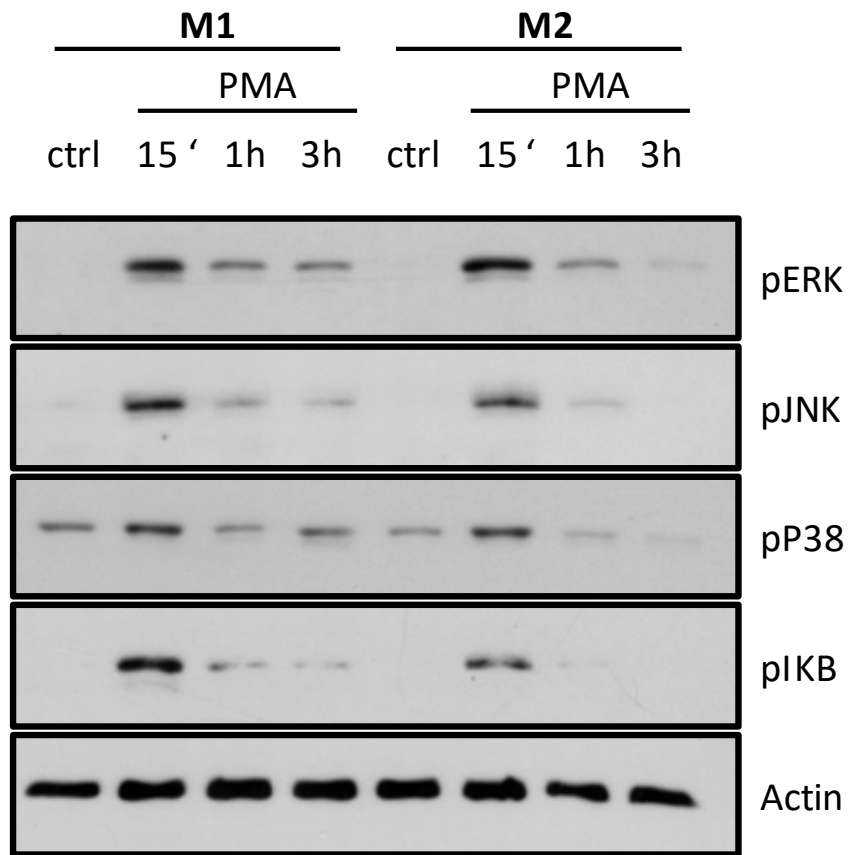

**A**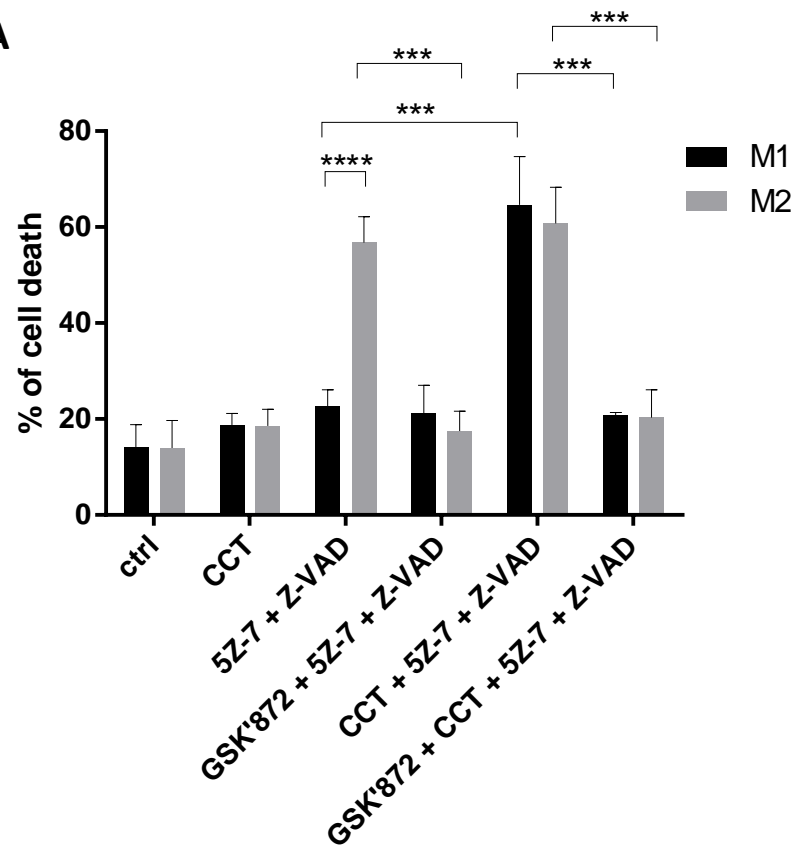**B**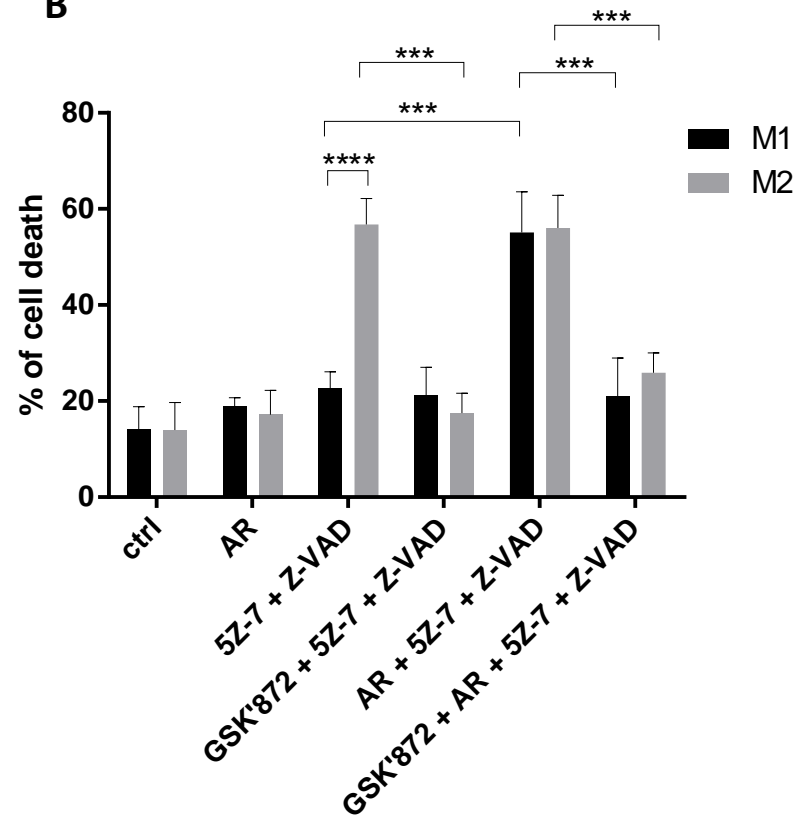**C**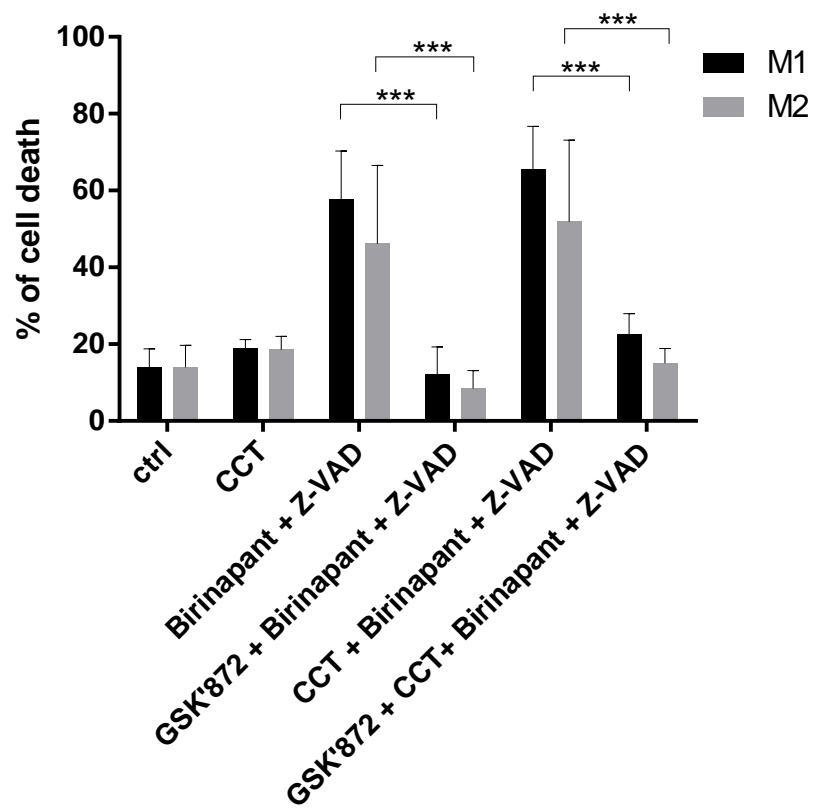**D**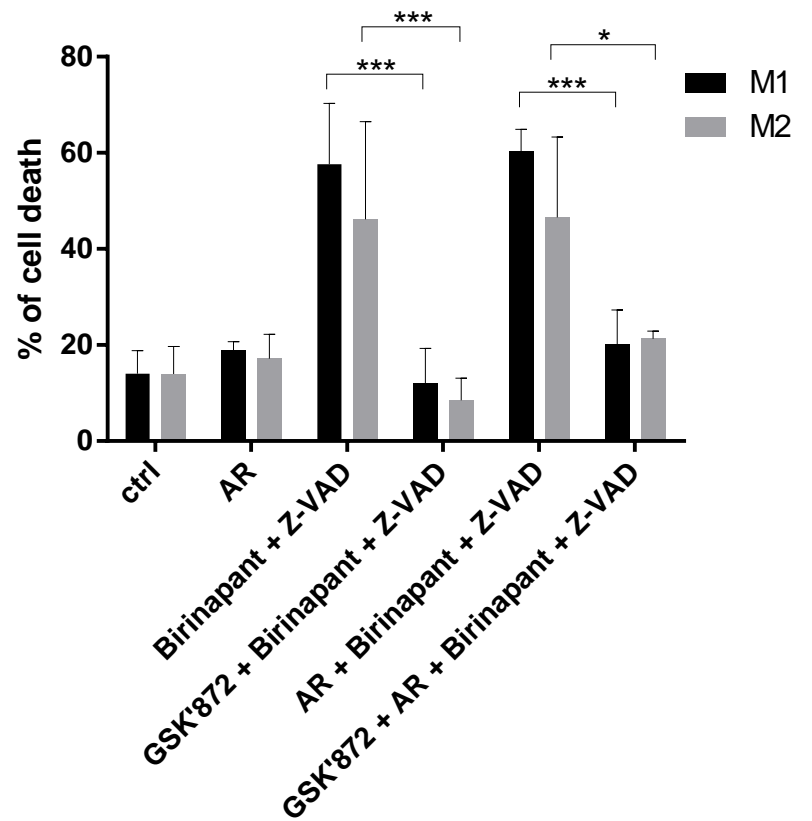

Supplement: 262_2020_2623_MOESM2_ESM.pdf [file 262_2020_2623_MOESM2_ESM.pdf]
